# Supplementary material for: A gene expression map of shoot domains reveals regulatory mechanisms
Source: Nat Commun. 2019 Jan 11;10:141. doi: 10.1038/s41467-018-08083-z (PMC6329838; doi:10.1038/s41467-018-08083-z)
Supplement: Supplementary file 16 — Supplementary Data 13 [file 41467_2018_8083_MOESM16_ESM.xlsx]

## Sheet: Supplementary Data 13
Supplementary Data 13. Lists of transcription factor genes used for meta analysis.
AP2/EREBP		ARF		ARID		AUX/IAA		bHLH		bZIP		C2C2-CO		C2C2-DOF		C2C2-GATA		C2C2-YABBY		C2H2		C3H		CAMTA		CCAAT-DR1		CCAAT-HAP2		CCAAT-HAP3		CCAAT-HAP5		CCP		E2F_DP		EIL		GEBP		GRAS		GRF		HB		HSF
AT1G74930		AT1G19850		AT3G43240		AT1G80390		AT3G23690		AT2G17770		AT3G07650		AT5G66940		AT3G51080		AT2G26580		AT3G23140		AT1G68200		AT2G22900		AT5G08190		AT1G30500		AT2G38880		AT3G48590		AT2G20110		AT5G03415		AT5G65100		AT2G25650		AT1G07530		AT3G13960		AT1G46480		AT5G54070
AT1G78080		AT1G34310		AT3G13350		AT2G22670		AT4G28790		AT3G30530		AT1G68520		AT3G50410		AT5G25830		AT1G69180		AT5G22890		AT5G15820		AT3G16940		AT5G23090		AT5G06510		AT2G47810		AT5G43250		AT4G29000		AT5G02470		AT5G21120		AT5G14280		AT2G01570		AT2G06200		AT1G23380		AT1G77570
AT1G77200		AT1G35540		AT1G55650		AT5G25890		AT3G59060		AT1G75390		AT4G38960		AT5G62430		AT4G17570		AT2G45190		AT5G04240		AT2G46495		AT5G09410				AT2G34720		AT2G13570		AT5G27910		AT3G04850		AT5G14960		AT2G27050		AT1G11510		AT3G60630		AT2G22840		AT4G04890		AT5G03720
AT2G31230		AT5G37020		AT1G76110		AT2G46990		AT1G72210		AT2G12980		AT1G28050		AT1G69570		AT3G24050		AT4G00180		AT5G15480				AT1G67910				AT5G12840		AT1G09030		AT1G54830		AT3G22780		AT5G22220		AT1G73730		AT1G61730		AT5G59450		AT4G37740		AT3G11260		AT4G17750
AT4G16750		AT2G33860		AT1G76510		AT3G04730		AT1G03040		AT3G56660		AT4G15250		AT5G60850		AT3G16870		AT1G23420		AT5G61190				AT4G16150				AT3G05690		AT3G53340		AT5G50480		AT3G16160		AT3G48160		AT3G20770		AT4G00610		AT4G17230		AT4G24150		AT1G26960		AT3G63350
AT3G61630		AT4G23980		AT1G04880		AT4G29080		AT1G18400		AT2G12900		AT2G24790		AT5G60200		AT3G60530				AT3G46090				AT5G64220				AT1G54160		AT4G14540		AT1G08970		AT5G25790		AT2G36010		AT5G10120		AT4G00250		AT3G03450		AT2G45480		AT2G35940		AT4G11660
AT5G52020		AT1G30330		AT1G20910		AT5G65670		AT4G28811		AT3G49760		AT1G73870		AT3G45610		AT3G06740				AT3G05760								AT3G20910		AT5G47670		AT1G07980		AT4G14770		AT1G47870				AT4G00270		AT1G63100		AT5G53660		AT1G75430		AT1G67970
AT3G16770		AT1G77850				AT3G23050		AT1G59640		AT4G35040		AT4G39070		AT2G37590		AT4G32890				AT1G66500								AT3G14020		AT5G47640		AT1G56170		AT3G22760		AT3G01330				AT1G44810		AT5G48150		AT2G36400		AT4G02560		AT3G51910
AT1G28160		AT1G43950				AT3G62100		AT5G09750		AT2G24340		AT5G15850		AT4G24060		AT3G20750				AT2G17180								AT1G72830		AT2G37060		AT5G50490								AT4G25210		AT1G21450				AT4G36870		AT3G24520
AT1G44830		AT1G34410				AT5G57420		AT5G39860		AT2G31370		AT3G21150		AT5G65590		AT3G50870				AT1G01350								AT1G17590		AT1G21970		AT5G38140								AT3G04930		AT2G29060				AT1G28420		AT2G26150
AT2G23340		AT2G28350				AT4G28640		AT4G21341		AT5G06950		AT3G21880		AT2G28810		AT1G08000				AT5G04390												AT5G63470								AT2G01370		AT5G52510				AT4G17460		AT4G36990
AT2G28550		AT4G30080				AT2G01200		AT5G41315		AT5G65210		AT1G25440		AT3G55370		AT5G49300				AT5G44160												AT3G12480								AT1G66420		AT1G66350				AT1G19700		AT4G13980
AT3G23240		AT2G46530				AT3G23030		AT5G48560		AT3G19290		AT5G57660		AT5G02460		AT3G54810				AT5G05120												AT5G50470								AT4G01260		AT1G50600				AT5G05770		AT5G16820
AT5G44210		AT5G20730				AT2G33310		AT3G56980		AT3G17609		AT3G21890		AT3G61850		AT2G28340				AT2G41940																				AT5G28040		AT1G07520				AT3G01220		AT3G22830
AT1G63040		AT5G60450				AT4G14560		AT2G14760		AT1G43700		AT5G48250		AT4G00940		AT4G34680				AT1G66140																				AT4G00390		AT3G49950				AT2G27990		AT4G18870
AT4G18450		AT5G62000				AT3G15540		AT3G26744		AT1G42990		AT5G24930		AT2G46590		AT5G56860				AT3G02790																				AT2G36340		AT5G17490				AT3G03260		AT4G18880
AT4G34410		AT5G62010				AT1G04250		AT2G31730		AT3G58120		AT1G68190		AT3G47500		AT3G21175				AT5G42640																						AT3G13840				AT3G01470		AT1G46264
AT5G05410		AT1G35240				AT4G14550		AT3G20640		AT2G16770		AT3G02380		AT4G21030		AT1G08010				AT2G19380																						AT1G55580				AT1G20710		AT5G45710
AT1G21910		AT1G59750				AT1G51950		AT2G47270		AT2G40620		AT1G78600		AT4G21040		AT4G26150				AT4G12240																						AT3G46600				AT4G35550		AT4G19630
AT3G14230		AT1G35520				AT1G04550		AT3G56770		AT2G21235		AT1G49130		AT3G52440		AT5G47140				AT3G53820																						AT2G04890				AT5G15150		AT5G43840
AT2G33710		AT1G34170				AT1G04240		AT3G47710		AT1G19490		AT2G33500		AT4G21050		AT4G24470				AT4G17810																						AT2G37650				AT2G46680		AT5G62020
AT4G25470		AT1G19220				AT1G04100		AT4G00870		AT5G44080		AT2G47890		AT1G51700		AT3G45170				AT1G65200																						AT4G00150				AT2G33880		AT1G32330
AT5G61590		AT3G61830				AT3G16500		AT1G05805		AT1G03970		AT4G27310		AT4G21080		AT2G18380				AT3G50700																						AT2G45160				AT1G69780		AT3G02990
AT5G19790		AT1G34390				AT1G15050		AT5G10570		AT4G02640		AT1G60250		AT1G28310		AT5G66320				AT3G49930																						AT4G37650				AT2G18550		AT2G41690
AT5G67000						AT4G32275		AT4G05170		AT4G38900		AT1G75540		AT1G21340		AT5G26930				AT2G26940																						AT4G08250				AT5G66700
AT4G36900						AT5G43700		AT5G46830		AT5G28770		AT2G21320		AT2G34140		AT4G36620				AT1G80730																						AT4G36710				AT2G17950
AT2G25820						AT1G52830		AT4G16430		AT3G51960		AT5G54470		AT1G64620		AT4G36240				AT2G01940																						AT1G50420				AT5G46880
AT3G57600						AT1G15580		AT2G40200		AT1G68640		AT5G15840		AT1G29160		AT1G51600				AT2G27650																						AT3G54220				AT5G60690
AT2G36450						AT3G17600		AT3G17100		AT1G32150				AT4G38000		AT2G45050				AT3G57670																						AT5G66770				AT4G29940
AT3G54320								AT5G43175		AT1G08320				AT3G21270						AT5G54630																						AT3G50650				AT5G06710
AT5G61600								AT5G65320		AT4G37730				AT1G07640						AT4G27240																						AT5G41920				AT4G25530
AT3G11020								AT1G22380		AT4G34590				AT1G26790						AT5G59820																						AT1G14920				AT2G23760
AT5G43410								AT2G27230		AT2G42380				AT2G28510						AT5G02660																										AT2G01500
AT4G32800								AT1G68810		AT2G13130				AT5G62940						AT1G68360																										AT4G36740
AT5G18450								AT1G05710		AT4G34000				AT5G39660						AT1G34790																										AT3G18010
AT1G43160								AT1G69010		AT5G08141										AT5G43540																										AT5G03790
AT4G39780								AT3G22100		AT2G04038										AT1G68130																										AT1G62360
AT5G07580								AT5G38860		AT5G06839										AT1G65120																										AT1G17920
AT3G25890								AT5G09460		AT2G13150										AT5G14140																										AT2G16400
AT1G49120								AT4G28800		AT3G62420										AT3G10470																										AT4G37790
AT4G28140								AT4G09820		AT5G60830										AT3G45260																										AT1G23370
AT4G17490								AT1G02340		AT2G46270										AT2G23740																										AT5G25220
AT4G27950								AT3G23210		AT5G24800										AT1G50670																										AT2G27220
AT2G40340								AT3G57800		AT5G38800										AT3G01030																										AT3G19510
AT4G17500								AT1G35460		AT3G12250										AT1G04850																										AT4G40060
AT4G31060								AT1G73830		AT4G36730										AT3G57480																										AT4G32040
AT2G44840								AT1G25310		AT5G11260										AT1G02040																										AT5G46010
AT3G15210								AT4G30410		AT2G36270										AT5G52010																										AT2G32370
AT5G10510								AT1G27740		AT3G54620										AT2G02080																										AT2G22800
AT1G22810								AT2G24260		AT5G06960										AT2G34240																										AT1G20700
AT1G12980								AT1G30670		AT2G21230										AT2G27100																										AT1G70510
AT5G67010								AT4G28815		AT5G07160										AT5G61470																										AT5G44180
AT4G25481								AT3G50330		AT1G13600										AT4G35280																										AT1G62990
AT3G25730								AT1G25330		AT4G01120										AT1G75710																										AT4G00730
AT1G03800								AT2G20180		AT1G77920										AT5G10970																										AT4G17710
AT5G13330								AT4G29930		AT2G22850										AT5G16470																										AT2G36610
AT2G41710								AT4G34530		AT5G15830										AT1G26610																										AT1G73360
AT1G71520								AT5G65640		AT1G22070										AT2G29660																										AT4G21750
AT1G12890								AT1G10120		AT5G10030										AT4G35700																										AT3G03660
AT1G01250								AT5G43650		AT1G68880										AT2G27630																										AT1G05230
AT1G33760								AT1G68240		AT4G35900										AT3G60580																										AT5G47370
AT1G53170								AT3G21330		AT5G49450										AT3G29340																										AT1G70920
AT1G04370								AT1G49770		AT2G40950										AT1G34370																										AT4G34610
AT1G68840								AT2G22760		AT3G44460										AT4G16845																										AT5G52170
AT2G40350								AT5G56960		AT2G18160										AT5G54360																										AT5G41410
AT3G20840								AT2G31210		AT3G10800										AT1G10480																										AT4G03250
AT4G13040								AT1G32640		AT1G49720										AT5G57520																										AT2G28610
AT2G46310								AT5G51790		AT5G42910										AT1G14580																										AT5G59340
AT1G79700								AT1G27660		AT2G41070										AT4G26030																										AT4G32880
AT1G28360								AT5G53210		AT1G06070										AT2G36475																										AT4G32980
AT1G46768								AT4G17880		AT3G56850										AT5G66730																										AT2G01430
AT4G25490								AT5G64340		AT1G06850										AT3G27970																										AT5G02030
AT5G25390								AT4G30980		AT1G59530										AT1G49900																										AT2G44910
AT5G64750								AT3G25710		AT2G35530										AT5G61940																										AT5G17810
AT1G71130								AT1G22490												AT2G35670																										AT5G17320
AT4G36920								AT5G54680												AT5G56200																										AT2G34710
AT3G20310								AT1G68920												AT5G60470																										AT5G11060
AT1G24590								AT2G46970												AT3G02860																										AT5G53980
AT1G72570								AT1G74500												AT1G55460																										AT4G08150
AT5G17430								AT2G20095												AT3G23130																										AT1G34650
AT1G71450								AT3G06120												AT3G46080																										AT3G60390
AT5G47220								AT2G18300												AT2G18490																										AT1G52150
AT5G60120								AT5G04150												AT2G37740																										AT2G22430
AT2G40220								AT4G25410												AT3G12270																										AT1G27050
AT5G67180								AT1G06170												AT1G04445																										AT1G75410
AT1G16060								AT4G36540												AT1G26590																										AT1G30490
AT1G25470								AT4G21330												AT1G25250																										AT3G61150
AT1G12610								AT5G50010												AT4G02670																										AT3G61890
AT1G22190								AT5G62610												AT2G45120																										AT5G65310
AT1G28370								AT4G02590												AT1G72050																										AT4G16780
AT1G50680								AT2G42280												AT3G58070																										AT5G45980
AT2G44940								AT3G61950												AT2G01650																										AT1G79840
AT3G50260								AT4G00050												AT5G06070
AT1G06160								AT1G10610												AT5G54340
AT5G65510								AT2G42300												AT1G74250
AT1G13260								AT3G56970												AT5G27880
AT5G18560								AT1G51070												AT5G01160
AT3G23220								AT5G61270												AT3G44750
AT4G23750								AT2G43010												AT4G04885
AT2G38340								AT1G64625												AT3G47890
AT2G22200								AT4G36060												AT2G47090
AT5G13910								AT4G30180												AT3G47910
AT5G47230								AT5G67060												AT3G19580
AT5G25810								AT1G62975												AT5G03740
AT1G77640								AT1G61660												AT3G53600
AT5G50080								AT1G09250												AT1G01930
AT1G25560								AT1G71200												AT1G43860
AT1G19210								AT1G66470												AT1G68480
AT5G67190								AT2G41130												AT1G24630
AT2G20880								AT1G31050												AT5G22990
AT2G35700								AT2G28160												AT5G04340
AT5G51190								AT3G06590												AT1G67030
AT1G53910								AT5G46691												AT1G65110
AT3G16280								AT4G01460												AT3G20880
AT2G47520								AT4G00120												AT1G30970
AT5G21960								AT3G62090												AT4G31420
AT5G25190								AT3G24140												AT1G65130
AT1G64380								AT4G14410												AT1G02030
AT1G15360								AT3G05800												AT5G01860
AT4G13620								AT3G07340												AT5G43170
AT5G07310								AT5G37800												AT5G03150
AT1G68550								AT5G08130												AT2G02070
AT3G60490								AT1G63650												AT1G11490
AT2G20350								AT5G15160												AT3G62850
AT3G54990								AT2G46510												AT2G36930
AT2G39250								AT4G38071												AT1G55110
AT3G23230								AT2G16910												AT1G13290
AT4G37750								AT1G26260												AT5G40310
AT5G11190								AT4G09180												AT5G25160
AT1G75490								AT1G01260												AT3G48430
AT5G61890								AT2G31280												AT2G28200
AT5G57390								AT4G36930												AT5G40710
AT1G63030								AT3G47640												AT5G48890
AT1G80580								AT5G01310												AT3G62240
AT5G65130								AT2G34820												AT2G28710
AT1G51190								AT5G46760												AT5G63280
AT5G53290								AT2G43140												AT2G24500
AT1G72360								AT5G50915												AT3G13810
AT1G36060								AT1G12540												AT2G42410
AT5G51990								AT2G22750												AT1G27730
AT4G11140								AT5G57150												AT2G37430
AT1G22985								AT3G19860												AT4G16610
AT1G12630								AT1G29950												AT5G43620
AT1G50640								AT2G41240												AT5G51230
AT5G11590								AT2G46810												AT1G03840
AT1G51120								AT3G19500												AT4G35610
								AT5G51780												AT1G51220
								AT2G22770												AT3G09290
								AT4G00480												AT5G03510
								AT2G31220												AT1G24625
								AT5G58010												AT3G46070
								AT2G31215												AT5G06650
								AT2G43060												AT2G15740
								AT1G51140												AT5G14010
								AT1G09530												AT2G48100
								AT4G37850												AT1G13400
								AT4G29100												AT5G61950
								AT5G67111												AT5G67450
								AT1G12860												AT5G51530
								AT4G33880												AT5G26610
								AT4G20970												AT1G47860
								AT4G25400												AT4G25610
																				AT1G08290
[truncated: 13 more columns]
